# Supplementary material
Source: PubMed Central journal article supplement (PMC2682537)
Supplement: NIHMS109036-supplement-1.pdf [file NIHMS109036-supplement-1.pdf]

**Table S1: Degree of *rp* message reduction in *rp* homozygous mutant embryos correlates with severity of homozygous mutant phenotype but does not correlate with incidence of zMPNSTs in adult *rp* heterozygotes.**

Incidence of zMPNSTs in adult *rp* heterozygotes was determined in Table 1. RNA was isolated from homozygous *rp* mutant embryos and their wild-type siblings. PCR was performed using serial dilutions of cDNA to detect the *rp* message and estimate the level of knockdown in the homozygous mutants compared to their wild-type siblings. The severity of the homozygous mutant phenotype was rated on a scale as follows:

+++ = severe defects, including very obvious brain necrosis on 1 dpf

++ = moderate defects, including some brain necrosis on 1 dpf

+ = mild defects: no visible necrosis on 1 dpf; mild necrosis and body curvature on 3 dpf

Note that while the fold *rp* message reduction in *rp* homozygotes generally correlates with the severity of the homozygous mutant phenotype, it does not correlate with the incidence of zMPNSTs in the adult *rp* heterozygotes.

| Gene          | Line           | Fold <i>rp</i> message reduction in <i>rp</i> homozygotes | Severity of homozygous mutant phenotype | Incidence of zMPNSTs in adult heterozygotes |
|---------------|----------------|-----------------------------------------------------------|-----------------------------------------|---------------------------------------------|
| <i>rpS15</i>  | <i>hi2430</i>  | 2000                                                      | +++                                     | 0%                                          |
| <i>rpS15a</i> | <i>hi2649</i>  | 200                                                       | +++                                     | 71%                                         |
| <i>rpS29</i>  | <i>hi2903</i>  | 200                                                       | +++                                     | 27%                                         |
| <i>rpS5</i>   | <i>hi577B</i>  | 50                                                        | ++                                      | 43%                                         |
| <i>rpL36a</i> | <i>hi10</i>    | 30                                                        | ++                                      | 63%                                         |
| <i>rpS8</i>   | <i>hi1974</i>  | 20                                                        | ++                                      | 62%                                         |
| <i>rpL36</i>  | <i>hi1807</i>  | 10                                                        | +                                       | 65%                                         |
| <i>rpS7</i>   | <i>hi1034B</i> | 10                                                        | ++                                      | 33%                                         |
| <i>rpL7</i>   | <i>hi1061</i>  | 5                                                         | ++                                      | 45%                                         |
| <i>rpL24</i>  | <i>hi1284</i>  | 5                                                         | +                                       | 0%                                          |
| <i>rpLP1</i>  | <i>hi1444</i>  | 3                                                         | +                                       | 0%                                          |

**Table S2: Heterozygous fish from the tumor-prone *hi258* (*rpL35*) line are growth-impaired.**

The fish depicted in Figure 2A represent one tank of offspring from an outcross of a *hi258* (*rpL35*) heterozygous fish. The weights of all fish and their genotypes are listed below. The smallest fish are *hi258* heterozygous (HET), the largest fish are wild-type (WT), and those in the middle of the weight range are either *hi258* heterozygous or wild-type.

| Weight (mg) | Genotype |
|-------------|----------|
| 2.1         | HET      |
| 2.2         | HET      |
| 3.0         | HET      |
| 3.4         | HET      |
| 3.4         | HET      |
| 6.2         | HET      |
| 6.7         | HET      |
| 8.7         | WT       |
| 11.2        | HET      |
| 11.8        | HET      |
| 12.3        | WT       |
| 15.3        | WT       |
| 15.3        | WT       |
| 16.8        | WT       |
| 17.6        | WT       |
| 18.0        | WT       |
| 20.5        | WT       |
| 21.2        | WT       |
| 23.7        | WT       |
| 27.1        | WT       |
